# Supplementary material for: Speech perception is similar for musicians and non-musicians across a wide range of conditions
Source: PubMed Central journal article supplement (PMC6639310; doi:10.1038/s41598-019-46728-1), 2019-07-18
Supplement: 41598_2019_46728_MOESM1_ESM.pdf [file 41598_2019_46728_MOESM1_ESM.pdf]

# Speech perception is similar for musicians and non-musicians across wide range of conditions

Sara M. K. Madsen, Marton Marschall, Torsten Dau and Andrew J. Oxenham

| Effect                                                  | F    | p-value | $\eta_G^2$ |
|---------------------------------------------------------|------|---------|------------|
| Onset age                                               | 1.88 | 0.18    | 0.02       |
| Onset age x reverberation                               | 1.80 | 0.19    | 0.005      |
| Onset age x spatial separation                          | 0.06 | 0.81    | 0.0002     |
| Onset age x Masker                                      | 0.91 | 0.35    | 0.005      |
| Onset age x reverberation x spatial separation          | 0    | 0.94    | <0.0001    |
| Onset age x reverberation x masker                      | 0.63 | 0.44    | 0.001      |
| Onset age x separation x masker                         | 1.14 | 0.29    | 0.005      |
| Onset age x reverberation x spatial separation x masker | 1.01 | 0.32    | 0.002      |

Supplementary Table S1: Results obtained when adding onset age as a covariate.

| Effect                                                          | F    | p-value | $\eta_G^2$ |
|-----------------------------------------------------------------|------|---------|------------|
| Hours of practice                                               | 2.68 | 0.11    | 0.03       |
| Hours of practice x reverberation                               | 0.46 | 0.50    | 0.001      |
| Hours of practice x spatial separation                          | 0.82 | 0.37    | 0.003      |
| Hours of practice x Masker                                      | 0.00 | 0.97    | <0.0001    |
| Hours of practice x reverberation x spatial separation          | 3.23 | 0.08    | 0.006      |
| Hours of practice x reverberation x masker                      | 0.06 | 0.80    | 0.0001     |
| Hours of practice x separation x masker                         | 0.12 | 0.73    | 0.0006     |
| Hours of practice x reverberation x spatial separation x masker | 0.59 | 0.45    | 0.001      |

Supplementary Table S2: Results obtained when adding accumulated hours of practice as a covariate

| Effect                                                          | F    | p-value | $\eta_G^2$ |
|-----------------------------------------------------------------|------|---------|------------|
| Years of training                                               | 0.06 | 0.81    | 0.0006     |
| Years of training x reverberation                               | 7.45 | 0.01    | 0.02       |
| Years of training x spatial separation                          | 1.41 | 0.24    | 0.05       |
| Years of training x Masker                                      | 0.06 | 0.80    | 0.0004     |
| Years of training x reverberation x spatial separation          | 0.32 | 0.58    | 0.0006     |
| Years of training x reverberation x masker                      | 1.44 | 0.24    | 0.003      |
| Years of training x separation x masker                         | 0.01 | 0.93    | <0.0001    |
| Years of training x reverberation x spatial separation x masker | 3.67 | 0.06    | 0.007      |

Supplementary Table S3: Statistical values obtained when adding years of training as a covariate

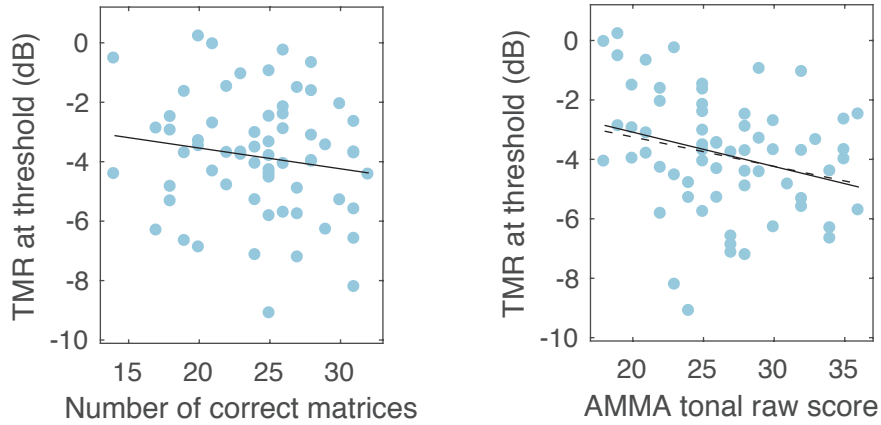

*Supplementary Figure S1:* Correlation between the average closed-set speech scores and the number of correct Raven's matrices ( $r = -0.16$ ,  $p = 0.22$ ; left) and the tonal AMMA score (right). Regression lines are shown for all participants (solid line;  $r = -0.28$ ,  $p = 0.024$ ) and for 58 participants (dashed line;  $r = -0.24$ ,  $p = 0.053$ ).

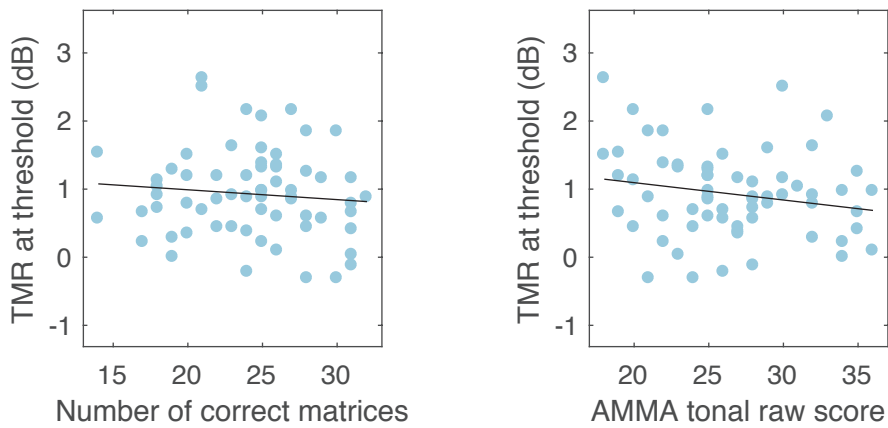

*Supplementary Figure S2:* Correlation between the average open-set speech scores and the number of correct Raven's matrices ( $r = -0.1$ ,  $p = 0.43$ ; left) and the tonal AMMA score ( $r = -0.19$ ,  $p = 0.13$ ; right).
